# Supplementary material
Source: PubMed Central journal article supplement (PMC2800265)

Web Figure 1. Noncentrality parameters for the case-parent design, based on a 4 degree-of-freedom model and a scenario with  $S_1$ ,  $S_2$ ,  $R_1$  and  $R_2$  being the relative risks for preterm delivery associated with one and two maternal copies and one and two fetal copies of the variant under study, respectively ( $S_1=1.5$ ,  $S_2=2$ ,  $R_{1F}=R_{1M}=1.5$ ,  $R_2=2$ ). The parameters for a case-control logistic analysis are estimated based on simulated powers, back-calculated to approximate the corresponding noncentrality parameters. The designs are all assumed to use a total of 600 genotypes, with 200 case-parent triads or 150 case pairs and 150 control pairs. Part A) shows the results for complete data and part B) shows the results for data where a random 20% of genotypes are missing. To calculate corresponding results for a scaled up or down number of genotypes, say  $N$ , simply multiply the noncentrality parameters by  $N/600$  and use the power cut-points shown. Dashed curves represent a case-base baby-mother analysis with all relationship constraints imposed; solid blue curves with dot markers represent a case-mother/control-mother analysis using logistic regression analysis; dotted red curves represent a case-parent log-linear analysis.

Web Figure 2. As for Web Figure 1, except that we now consider a scenario with 5 relative risk parameters, with  $R_1$  separated according to whether the source of the single fetal copy was maternal ( $R_{1M}$ ) or paternal ( $R_1$ ) ( $S_1=1.2$ ,  $S_2=1.5$ ,  $R_{1F}=1.2$ ,  $R_{1M}=1.8$ ,  $R_2=2.25$ ). This full model calculation corresponds to Model 2 of the paper.

Web Figure 1A

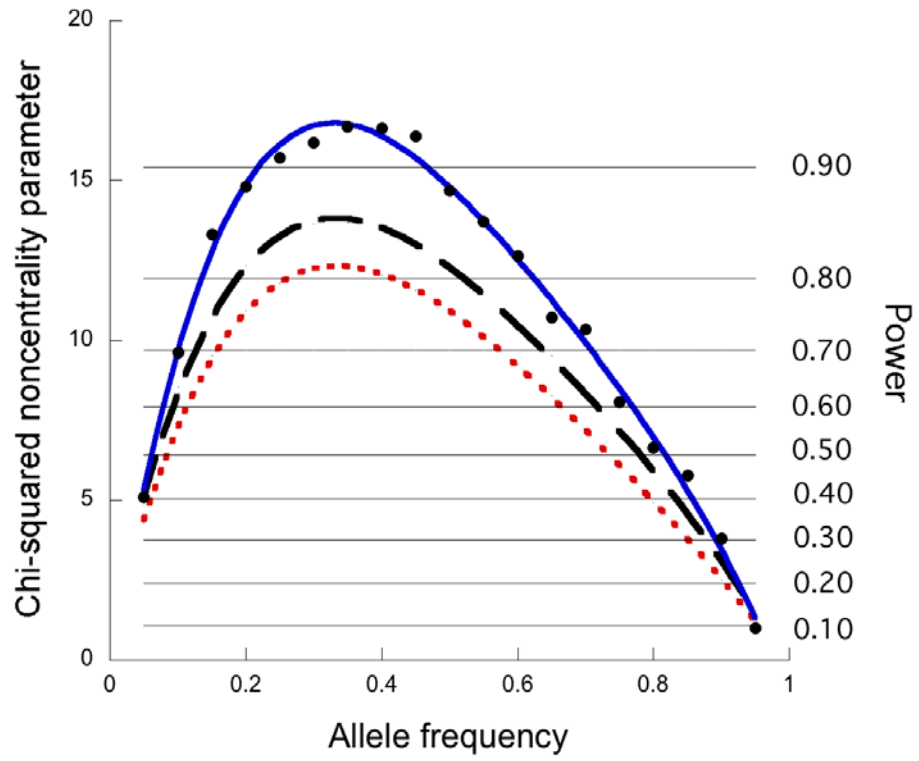

Web Figure 1B

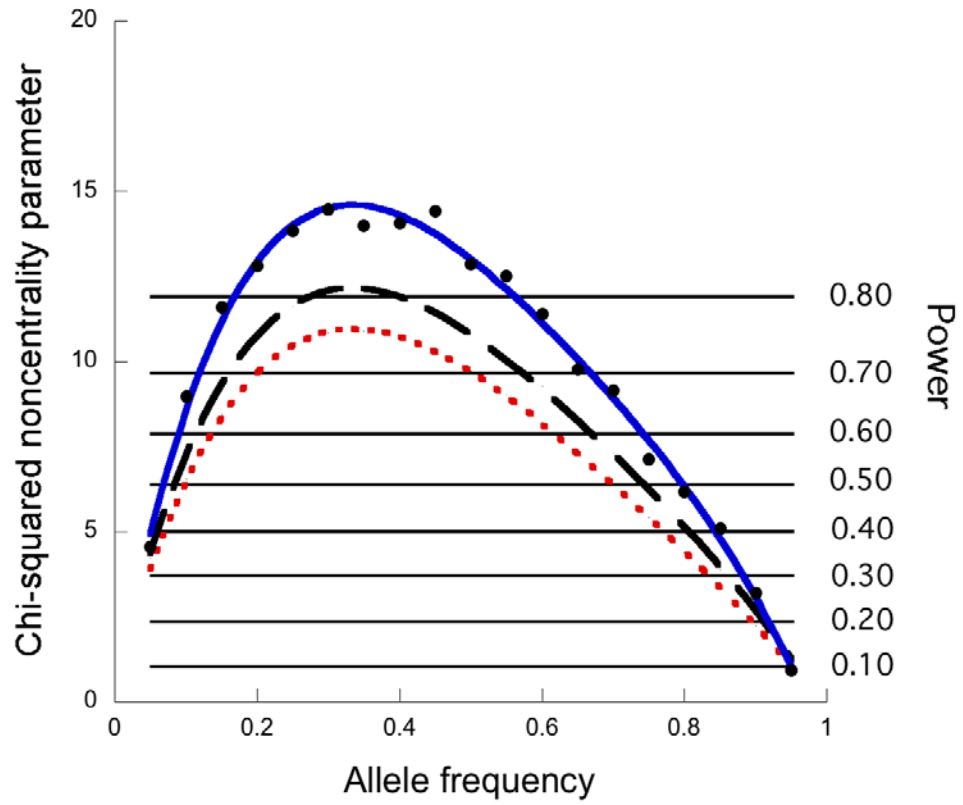

Web Figure 2A

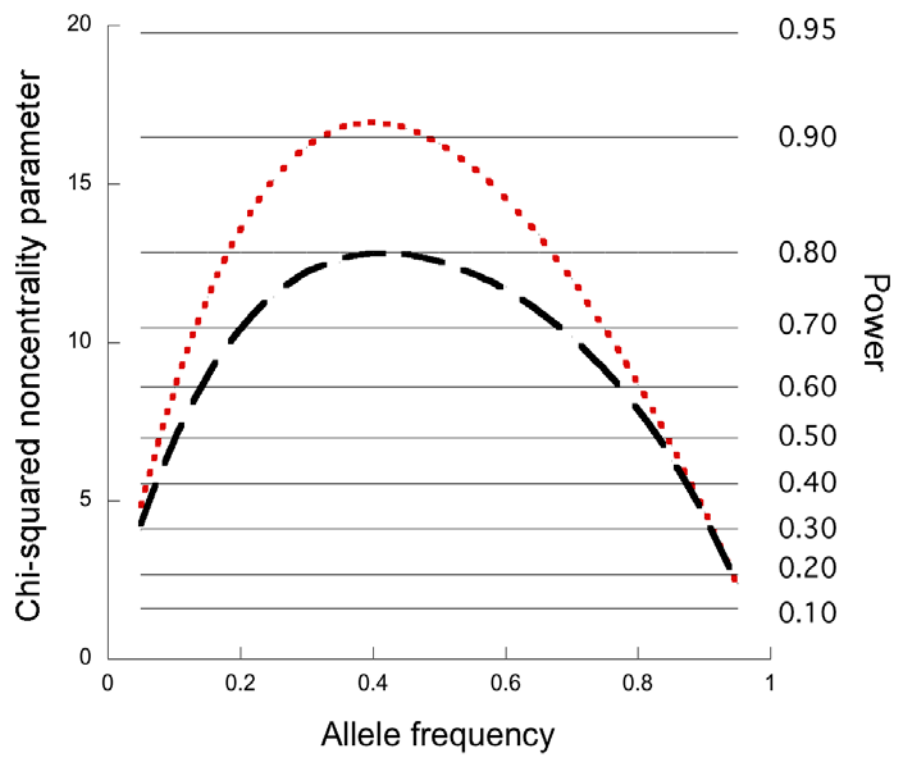

Web Figure 2B

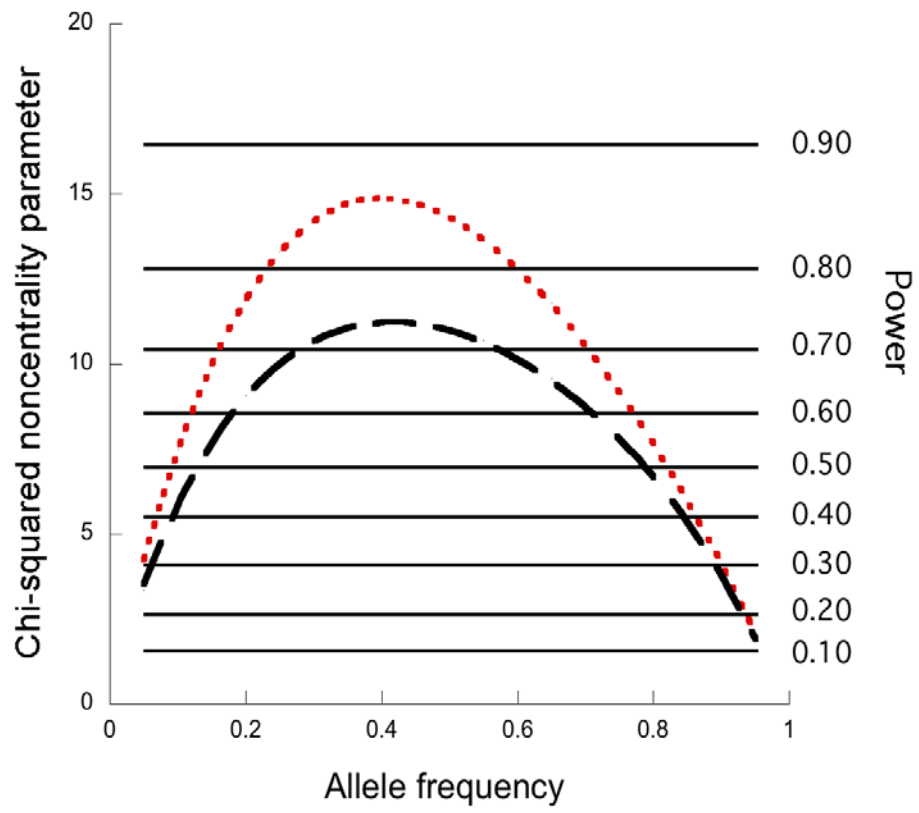

Supplement: kwp325_1.pdf [file kwp325_1.pdf]
